# Supplementary material for: Empirical Modeling of Zn/ZnO Nanoparticles Decorated/Conjugated with Fotolon (Chlorine e6) Based Photodynamic Therapy towards Liver Cancer Treatment
Source: PubMed Central journal article supplement (PMC6357181; doi:10.3390/mi10010060), 2019-01-17
Supplement: micromachines-10-00060-s001.pdf [file micromachines-10-00060-s001.pdf]

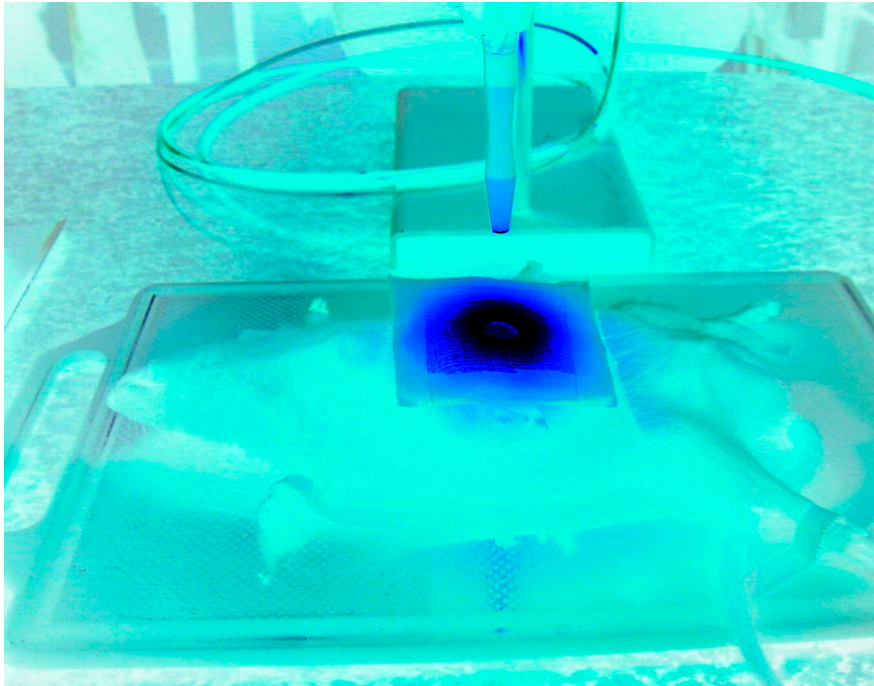

**Figure S1.** Photodynamic therapy (PDT) overview of wistar rat model.
